# Supplementary material for: Chemical bibliographic databases: the influence of term indexing policies on topic searches
Source: Royal Society of Chemistry journal article supplement (doi:10.1039/c5nj01077b), 2015-01-01
Supplement: c5nj01077b2.pdf [file c5nj01077b2.pdf]

**Table 1:** Diversity of studied chemical domains.

The 16 studied expressions were queried in WoS and the two most representative WoS's categories were reported in columns 2 and 4. Columns 3 and 5 refer to the given item counts. Column 6 is a reminder of values reported in Table 3, column 5 of the manuscript. Column 7 displays the reference count obtained from 1900 to 2014 after discarding meeting abstracts and corrections.

| Queried expression in WoS               | Category 1                       |            | Category 2                           |            | Unique articles | WoS's counts |
|-----------------------------------------|----------------------------------|------------|--------------------------------------|------------|-----------------|--------------|
|                                         | Item                             | Item count | Item                                 | Item count |                 |              |
| allene(s)                               | Chemistry, Organic               | 185        | Chemistry, Multidisciplinary         | 131        | 466             | 10543        |
| organocatalysis                         | Chemistry, Organic               | 434        | Chemistry, Multidisciplinary         | 334        | 963             | 8873         |
| peptidomimetics                         | Biochemistry & Molecular Biology | 78         | Chemistry, Organic                   | 57         | 257             | 4984         |
| agostic interactions                    | Chemistry, Inorganic & Nuclear   | 37         | Chemistry, Multidisciplinary         | 19         | 63              | 1171         |
| battery electrodes                      | Electrochemistry                 | 345        | Chemistry, Physical                  | 208        | 1008            | 17215        |
| graphene biosensors                     | Chemistry, Multidisciplinary     | 17         | Chemistry, Analytical                | 13         | 47              | 1030         |
| N-heterocyclic carbene(s)               | Chemistry, Multidisciplinary     | 208        | Chemistry, Inorganic & Nuclear       | 130        | 629             | 7291         |
| modified nucleoside(s)                  | Energy & Fuels                   | 43         | Chemistry, Organic                   | 19         | 114             | 2715         |
| phosphine ligand(s)                     | Chemistry, Inorganic & Nuclear   | 123        | Chemistry, Multidisciplinary         | 82         | 319             | 6537         |
| renewable feedstock                     | Energy & Fuels                   | 13         | Biotechnology & Applied Microbiology | 8          | 92              | 1102         |
| copper (cu) catalyzed arylation         | Chemistry, Organic               | 60         | Chemistry, Multidisciplinary         | 29         | 103             | 976          |
| hybrid materials and nanoparticles      | Chemistry, Multidisciplinary     | 88         | Chemistry, Physical                  | 42         | 234             | 2787         |
| viscosity of ionic liquids              | Chemistry, Physical              | 110        | Chemistry, Multidisciplinary         | 83         | 350             | 3728         |
| band gap in solar cells                 | Materials Science                | 115        | Chemistry, Physical                  | 109        | 599             | 7990         |
| statistical analyses of DNA microarrays | Biochemical Research Methods     | 20         | Oncology                             | 14         | 93              | 1086         |
| surface area in mesoporous materials    | Chemistry, Physical              | 139        | Chemistry, Multidisciplinary         | 82         | 193             | 6299         |
